# Supplementary material
Source: publisher figshare collection journal article supplement (https://acs.figshare.com/ndownloader/files/17597495)
Supplement: Supplementary file 1 [file 17597495]

Supporting Information

# Polymerized Ionic Liquid-Containing Interpenetrating Network Solid Polymer Electrolytes for All-Solid-State Lithium Metal Batteries

*Xiaowei Li, Yongwei Zheng, Qiwei Pan, Christopher Y. Li\**

Department of Materials Science and Engineering, Drexel University, Philadelphia,  
PA 19104, United States

E-mail: [chrisli@drexel.edu](mailto:chrisli@drexel.edu)

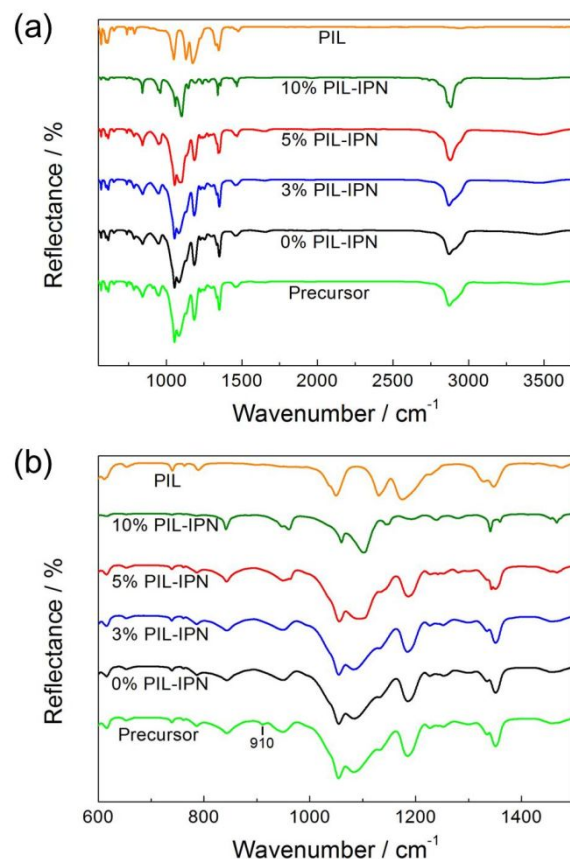

**Figure S1.** (a) FTIR spectra of the PIL, the precursor of POSS-4PEG2K and the PIL-IPN SPEs; (b) the enlarged spectra between 600 and 1500  $\text{cm}^{-1}$ .

As shown in the FTIR spectra, bands at around 2910, 2870, 1352 and 950  $\text{cm}^{-1}$  are related to the  $\text{CH}_2$  on PEG chain. The band at 1476  $\text{cm}^{-1}$  belongs to the P(DADMA) cation of PIL. The band at around 1100  $\text{cm}^{-1}$  corresponds to the stretching of C-O-C of PEG chains and Si-O-Si of POSS. The bands of the TFSI anion are located at 1335, 1226, 1185, 1055, 785, 740 and 652  $\text{cm}^{-1}$ . The characteristic peak of the epoxy group at 910  $\text{cm}^{-1}$  disappears in the four SPEs after cross-linking, indicating that most of the epoxy groups have reacted in the SPEs.

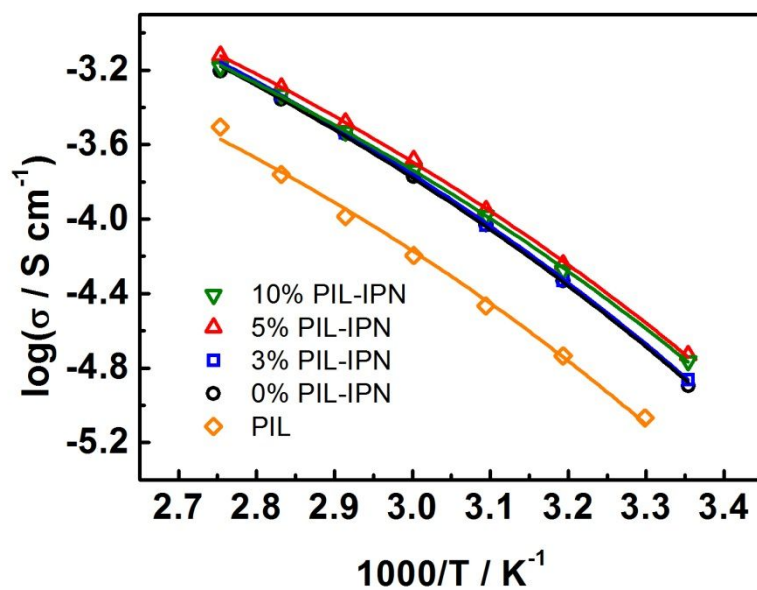

**Figure S2.** VTF fitting of the temperature dependent ionic conductivity.

**Table S1.** VTF fitting parameters of the SPE samples

| Sample      | A (S cm <sup>-1</sup> K <sup>1/2</sup> ) | Ea (kJ mol <sup>-1</sup> ) |
|-------------|------------------------------------------|----------------------------|
| 0% PIL-IPN  | 21.3±2.2                                 | 11.5±0.1                   |
| 3% PIL-IPN  | 22.8±2.4                                 | 11.5±0.1                   |
| 5% PIL-IPN  | 16.4±1.1                                 | 10.8±0.1                   |
| 10% PIL-IPN | 13.2±0.7                                 | 10.6±0.1                   |
| PIL         | 5.3±1.4                                  | 10.1±0.3                   |

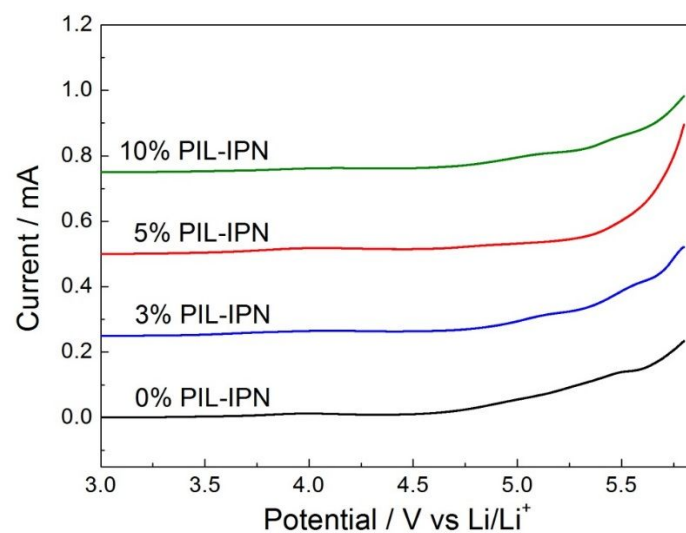

**Figure S3.** LSV curves of the PIL-IPN SPEs.

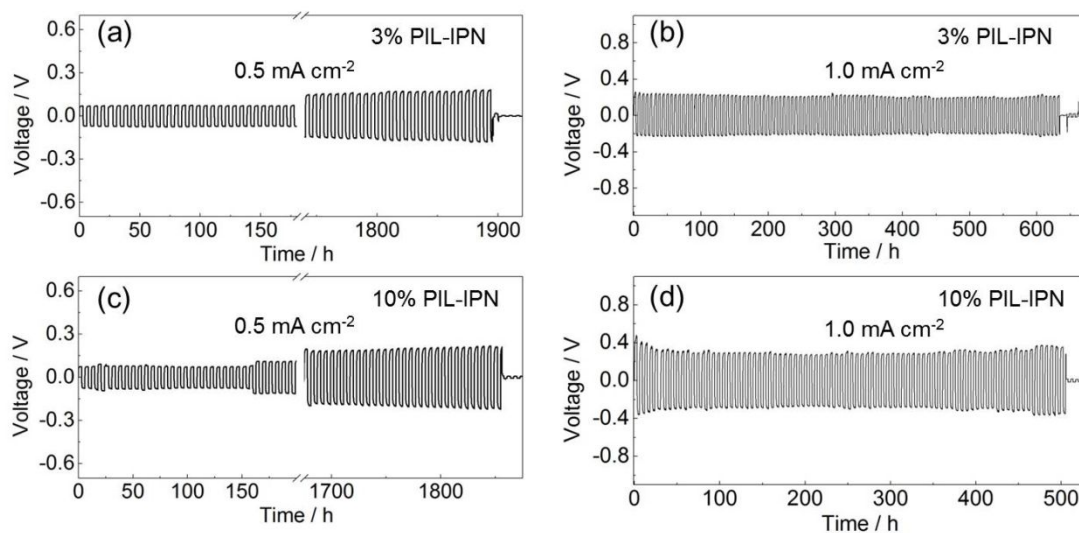

**Figure S4.** Time-dependent voltage profiles for symmetrical lithium cells containing the 3% and 10% PIL-IPN SPE samples at 90 °C with 3 h charge/discharge in each cycle under the current density of (a, c) 0.5 mA cm<sup>-2</sup> and (b, d) 1.0 mA cm<sup>-2</sup>.

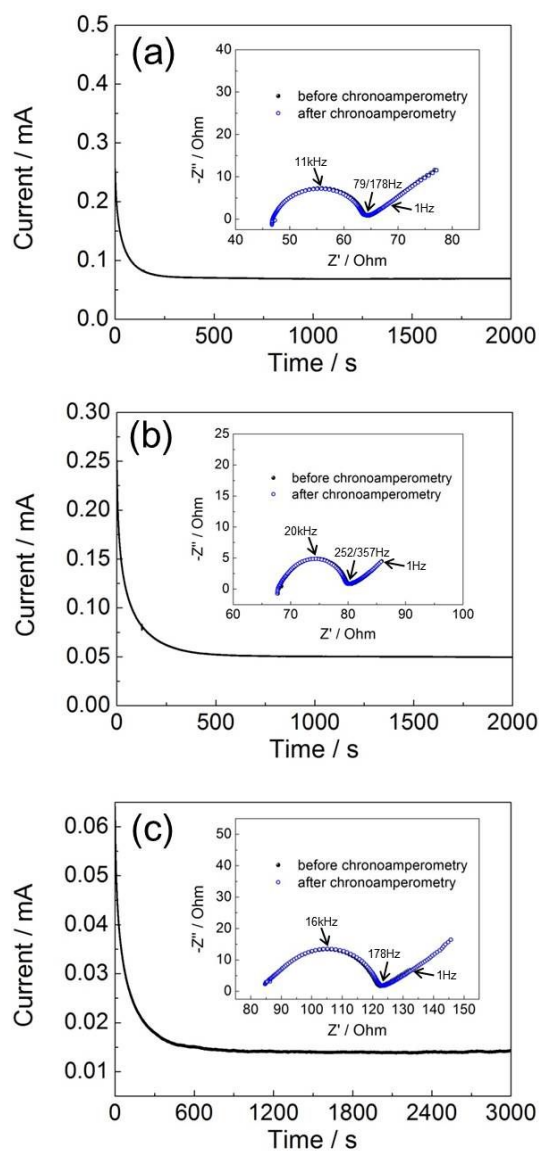

**Figure S5.** Chronoamperometry profiles and the impedance responses under initial and steady-state current conditions of the symmetrical lithium cells with (a) 3% PIL-IPN, (b) 5% PIL-IPN and (c) 10% PIL-IPN sample at 90 °C.

In the impedance spectra of symmetrical lithium cells shown in **Figure S5**, the real axis intercept at high frequency corresponds to the bulk of the electrolyte  $R_b$ . The depressed semicircle from high to middle frequency domain is attributed to the interphase resistance (SEI layer and charge transfer resistance)  $R_i$ . The spike at low frequency corresponds to Warburg resistance characteristic of the transport of charged particles.<sup>[1]</sup>

### Short-circuit time prediction with the Chazalviel model

According to the Chazalviel model, the dendrite growth velocity  $v$  is equal to the drift velocity of anions in the applied electric field, so it is given by:

$$v = \mu_a E_0 \quad (1)$$

where  $\mu_a$  is the anion mobility, the applied electric field  $E_0 = J/\sigma$ , and  $\sigma$  is the DC ionic conductivity. The time required for dendrites to grow, propagate and traverse the distance  $L$  between electrodes is described by:

$$t_g = \frac{\sigma L}{\mu_a J} \quad (2)$$

Therefore, according to the model, the predicted short-circuit time  $t_{sc}$  will be:

$$t_{sc} = \pi D \left( \frac{eC_0}{2Jt_a} \right)^2 + \frac{\sigma L}{\mu_a J} \quad (3)$$

The ambipolar diffusion coefficient  $D$  could be calculated using the Nernst-Einstein equation

$$D = \frac{\sigma kT}{C_0 q^2} \quad (4)$$

where  $k$  is the Boltzmann constant,  $T$  is the temperature, and  $q$  is the diffusing species charge. To estimate the effective  $C_0$ , we also assume LiTFSI is completely dissociated.

The anion mobility  $\mu_a$  could be obtained from the Einstein relation as:

$$\mu_a = \frac{qDt_a}{kT} \quad (5)$$

### References

- [1] R. Bouchet, S. Lascaud, M. Rosso, *J. Electrochem. Soc.*, **2003**, *150*, A1385.
